1 **Cost of tuberculosis-related aeromedical retrievals in the Torres Strait, Australia**

2 J'Belle Foster,<sup>1,2,3</sup> Daniel Judge<sup>3</sup>, Diana Mendez,<sup>1,4</sup> Ben J. Marais<sup>5</sup>, Dunstan Peniyamina<sup>6</sup>, Emma S.  
3 McBryde<sup>1,2,3</sup>

4

5 <sup>1</sup> Australian Institute of Tropical Health and Medicine, Townsville, Queensland, Australia

6 <sup>2</sup> James Cook University College of Medicine and Dentistry, Townsville, Queensland, Australia

7 <sup>3</sup> Torres and Cape Tuberculosis Control Unit, Thursday Island, Queensland, Australia

8 <sup>4</sup> James Cook University Division of Tropical Health and Medicine, Townsville, Queensland Australia

9 <sup>5</sup> Sydney Institute for Infectious Diseases and Biosecurity, Westmead, New South Wales, Australia

10 <sup>6</sup> Cairns Tropical Public Health Service, Cairns, Queensland, Australia

11

12 **ABSTRACT**

13 Tuberculosis (TB) remains a disease of public health significance at the Australia / Papua New Guinea  
14 (PNG) international border. In the remote Torres Strait Islands, aeromedical evacuation is a  
15 necessary but costly component of TB management and patients with critical care needs require  
16 support to prevent onward TB transmission. A detailed costing of an exemplar TB patient from PNG  
17 who presented to a Queensland Health facility in the Torres Strait and required urgent aeromedical  
18 evacuation was performed. Data were drawn from patient charts, financial and clinical information  
19 systems used within Queensland Health and the Torres and Cape Hospital and Health Service. The  
20 total cost of aeromedical evacuation was AUD 124,280; 54% of the cost was attributed to travel.  
21 Between 2016 and 2019, 19 patients diagnosed with TB were medically evacuated from an outer  
22 Torres Strait Island with a median length of hospital stay of 57 days. Aeromedical evacuation and  
23 medical management costs require adequate budget allocation.

24

25

26

27

28

29

30

31

32

33

34

**NOTE: This preprint reports new research that has not been certified by peer review and should not be used to guide clinical practice.**

## 35 **Introduction**

36 The Papua New Guinea (PNG) / Torres Strait border area is potentially a major source of drug  
37 susceptible, mono-resistant, drug-resistant and multi-drug resistant TB (MDR-TB) into Australia [1]. At  
38 the closest point, the Torres Strait Islands in Queensland are less than 5kms from PNG's Western  
39 Province [2]. Cross border dynamics and current TB prevention and control efforts are largely  
40 attributable to geographical, regional, political and administrative complexities and structures [3].  
41 Prior to international border closures in March 2020 due to the COVID-19 pandemic [4], the Torres  
42 Strait Treaty allowed residents of 13 Treaty villages in the Western Province of PNG and 14  
43 communities of the Torres Strait Islands in Australia to cross the international border for traditional  
44 purposes without health checks, visas or passports [5] (Figure 1). This freedom of movement coupled  
45 with the conservative TB incidence rate of 674 cases per 100,000 population in the Western Province  
46 of PNG [6], places the Indigenous population of the Torres Strait Islands of Queensland, Australia  
47 particularly vulnerable to TB transmission [7].

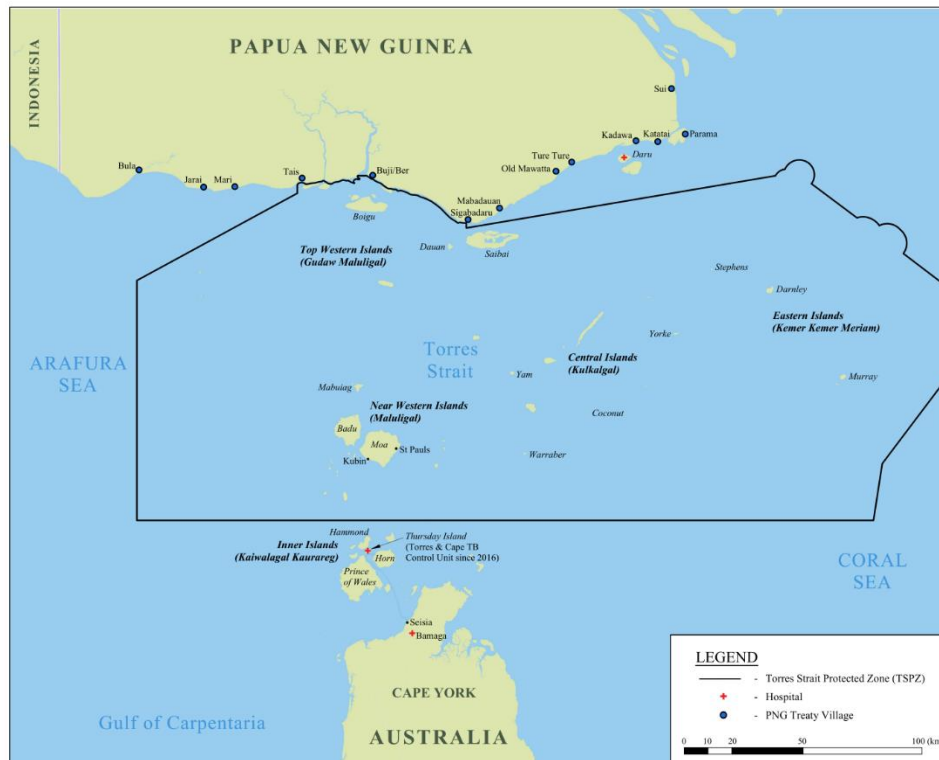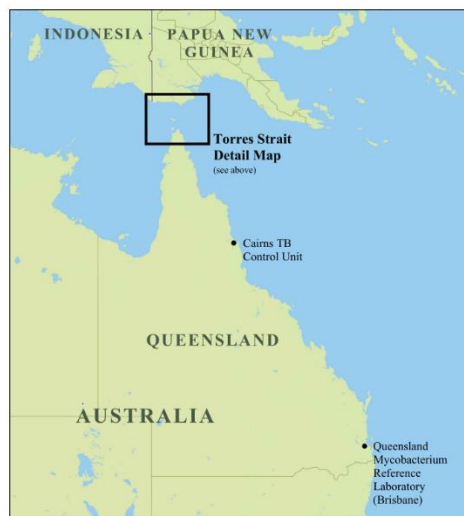

48  
 49 Figure 1. Map of A) the Torres Strait / Papua New Guinea cross-border region and B) relevant tuberculosis  
 50 referral centres in Queensland, Australia. CC BY 4.0<sup>1</sup>  
 51  
 52

<sup>1</sup> Traditional inhabitants of the Torres Strait Protected Zone and Treaty villages may cross this international border without passport or visa. DOI. <https://doi.org/10.6084/m9.figshare.16632823.v1>

53 PNG Treaty villages are among the poorest and most remote in PNG and lack access to clean running  
54 water and electricity [2]. Health service provision in the PNG Treaty villages is poor and in 2018, seven  
55 basic medical units and one health centre were frequently unstaffed or unstocked with basic medical  
56 supplies. The closest major health facility from the Treaty villages in the Western Province of PNG, is  
57 Daru General Hospital, located at least two hours away by personal boats powered by small outboard  
58 motors [2]. Hence, PNG residents frequently cross the narrow stretch of water separating the two  
59 countries to attend well-resourced Queensland Health Primary Health facilities located in the Torres  
60 Strait Islands in Australia [3].

61

62 Aeromedical evacuation is a necessary component of Queensland Health's obligation to provide  
63 critical health care services to anyone presenting to Torres and Cape Hospital and Health Service  
64 (TCHHS) primary health centres (PHCs) in the Torres Strait Protected Zone (TSPZ) including residents  
65 of PNG that live adjacent to the Torres Strait Islands (Figure 1). In recognition of health services  
66 provided to PNG nationals within the Queensland Health system, funding provided through the  
67 Commonwealth's 'Managing Torres Strait / Papua New Guinea Cross Border Health Issues (Schedule  
68 B) National Partnership Agreement', was AUD 18.9 million, between 1 July 2016 to 30 June 2020,  
69 averaging AUD 4.7 million per year [8]. This study describes detailed costing of the medical evacuation  
70 and medical management of one PNG national patient diagnosed with pulmonary TB who presented  
71 to Boigu Island in 2019 and who was subsequently admitted to both Thursday Island and Cairns  
72 Hospitals (Figure 1).

73

74 Medicare is Australia's health insurance scheme which provides free or low-cost access for all  
75 Australians to public hospitals, other medical services and medication [9]. Typically, overseas visitors  
76 whose countries do not have a Reciprocal Health Care Agreement with Australia are considered to be  
77 Medicare ineligible [10]. Medicare ineligible patients are responsible for fees and charges associated  
78 with both outpatient and inpatient care in Queensland [10]. As PNG does not have a Reciprocal Health

79 Care Agreement with Australia [11], PNG nationals without a Medicare card who enter Australia via a  
80 designated port, must pay for health services received. The exception to this rule is for PNG nationals  
81 who enter the Australian health care system via the TSPZ [12]. While these patients are still Medicare  
82 ineligible, costs incurred for managing and treating them are absorbed by Queensland Health Hospital  
83 and Health Services (HHSs), with partial funding to offset costs provided by the Australian Government  
84 Department of Health. This, in addition to remoteness and travel, are some of the reasons that the  
85 cost of health care per capita / per service rendered, is higher for HHSs in Far North Queensland than  
86 is typical across funding structures in other HHSs in Queensland [12].

87

88 The Australian Government provides important and strategic funding to manage the delivery of health  
89 services to PNG nationals which specifically includes but is not limited to the management of TB  
90 patients [8] to address transmission risk from PNG to Australia [13]. This funding is not intended to be  
91 used for PNG patients who have arrived in Australia with a passport at an authorised port, rather, it is  
92 designated for HHSs to provide healthcare to PNG nationals entering via the TSPZ. At no 'out of pocket'  
93 expense for PNG patients, funding includes but is not limited to: hospital admissions, outpatient  
94 services, management of TB patients, pathology, pharmaceuticals and patient transport [8]. Although  
95 Schedule B of the National Partnership Agreement states that funding for health services rendered  
96 includes '*patient transport (such as medical evacuations)*' [8], the Commonwealth funding does not  
97 cover the majority of expenses incurred by the services undertaking or supporting aeromedical  
98 evacuations such as Aeromedical Retrieval and Disaster Management Branch (ARDMB)-supported  
99 aeromedical evacuation, and these additional costs are borne by Queensland Health. This Federal  
100 funding allocated to managing PNG nationals seeking health care via the TSPZ is absorbed into the  
101 total funding pool for all health services rendered in HHSs.

102

103 **Materials and Methods**

104 The journey of a PNG national patient who presented to Boigu Island PHC in a critical condition and  
105 diagnosed with fully-susceptible pulmonary TB, was selected to cost a typical aeromedical retrieval  
106 case of TB. The case was considered typical (without excessive additional costs) as the patient was not  
107 accompanied by an escort and did not have drug-resistant TB or comorbidities which may have  
108 resulted in an extended hospital admission.

109

110 Details of the clinical presentation and pharmaceuticals, pathology, imaging and procedures ordered  
111 were reviewed in the TCHHS electronic medical record system, Best Practice, and in the TB patient  
112 information database used by the Torres and Cape TB Control Unit. Pathology and imaging services  
113 provided were cross checked against Queensland's laboratory results database AUSLAB, imaging  
114 databases Enterprise PACS and Merlin Web, and state-wide health service database The Viewer [14]  
115 (Appendix A). The Viewer and Best Practice were also accessed to ascertain the length of hospital stay  
116 for patients who were medically evacuated.

117

118 Aeromedical evacuation (Boigu Island to Thursday Island; Thursday Island to Horn Island and Horn  
119 Island to Cairns) costs to support this patient were sourced from the ARDMB. The ARDMB centrally  
120 manage funding and contracts with the Queensland Department of Health and Queensland  
121 Ambulance Service (QAS). QAS fund associated paramedic support when required during aeromedical  
122 evacuations in TCHHS. Both ARDMB and QAS sit within Queensland Health.

123

124 Clinicians within TCHHS will contact Retrieval Services Queensland (RSQ) with requests for  
125 aeromedical retrieval. RSQ are part of the ARDMB and centrally coordinate triaging, and the dispatch  
126 of paramedic support and aircraft including the rescue helicopter to respond to medical events  
127 requiring aeromedical evacuation [15,16]. The Royal Flying Doctors Service (RFDS) provide additional  
128 support for inter-facility transfers between Horn Island and Cairns on fixed-wing aircraft. Costs of  
129 RFDS interfacility transfer flights are funded by ARDMB through the Queensland Department of

130 Health as part of a state-wide contract to provide aeromedical support to Queensland communities  
131 (Appendix A). ARDMB will then recoup a proportion of costs from TCHHS. Costs were expressed in  
132 Australian dollars. See Appendix A for extended methodology.

133 Written consent from the patient was obtained for this study. Ethical approval was granted by the Far  
134 North Queensland Human Research Ethics Committee (HREC) (HREC/17/QCH/74-1157), and the Chair  
135 of James Cook University HREC, (H7380). Public Health Act authorisation (QCH/36155 – 1157) was also  
136 obtained to access patient data. Written approval was separately obtained from the Queensland  
137 ARDMB Research Committee, and Queensland Ambulance Service Torres and Cape York Local  
138 Ambulance Service Network.

139

## 140 **Results**

141 Table 1 shows that the cost to medically evacuate and medically manage one PNG national with  
142 uncomplicated fully-susceptible pulmonary TB from Boigu Island in 2019 was AUD 124,280. The total  
143 cost to medically evacuate the patient was AUD 58,029, with the remainder costs attributed to  
144 pathology, outpatient assessment, inpatient stay, pharmaceuticals and other travel. The Rescue 700  
145 flight from Boigu Island to Thursday Island and then from Thursday Island to Horn Island Airport  
146 comprised the single biggest expense (AUD 48,900), followed by in-patient care in Cairns Hospital  
147 (AUD 45,760).

148

149 **Table 1.** Cost of managing a Papua New Guinea patient with drug-susceptible tuberculosis (TB)  
150 requiring aeromedical retrieval from Boigu Island to the Australian health system in 2019<sup>2</sup>.  
151

| Activity                                    | Funded via Hospital and Health Services (HHSs) |                                  |                        |                                         | Funded via Queensland Health but external to HHSs                       |                                    | Total          |
|---------------------------------------------|------------------------------------------------|----------------------------------|------------------------|-----------------------------------------|-------------------------------------------------------------------------|------------------------------------|----------------|
|                                             | Boigu Island Primary Health Centre (TCHHS)     | Thursday Island Hospital (TCHHS) | Cairns Hospital (CHHS) | Torres and Cape TB Control Unit (TCHHS) | Queensland Aeromedical Retrieval and Disaster Management Branch (ARDMB) | Queensland Ambulance Service (QAS) |                |
| Single outpatient clinic visit <sup>†</sup> | 1,141                                          |                                  |                        | 282                                     |                                                                         |                                    | 1,423          |
| Outpatient pathology                        | 1,095                                          |                                  |                        |                                         |                                                                         |                                    | 1,095          |
| Aeromedical retrieval                       |                                                | 6,273 <sup>§</sup>               |                        |                                         | 2,457 <sup>§</sup><br>48,900 <sup>‡</sup>                               | 399 <sup>††</sup>                  | 58,029         |
| Inpatient hospital stay <sup>¶</sup>        |                                                | 8,005                            | 45,760                 |                                         |                                                                         |                                    | 53,765         |
| Other travel <sup>¶¶</sup>                  |                                                | 8996                             |                        |                                         |                                                                         |                                    | 8996           |
| Pharmaceuticals                             | 35                                             | 202                              | 735                    |                                         |                                                                         |                                    | 972            |
| <b>TOTAL</b>                                | <b>2,271</b>                                   | <b>23,476</b>                    | <b>46,495</b>          | <b>282</b>                              | <b>51,357</b>                                                           | <b>399</b>                         | <b>124,280</b> |

152  
153  
154  
155

<sup>2</sup> † Category 2 Emergency

¶ Includes costs associated with meals, wages, cleaning, diagnostic imaging/procedures and pathology. See Table 2 for actual imaging/procedures and pathology costs incurred

§ The total cost of the Royal Flying Doctors Service inter-facility transfer flight from Horn Island to Cairns was \$8,730 which was funded by ARDMB through Queensland Department of Health. ARDMB recovered a proportion (72%) of the full amount from TCHHS.

‡ Rescue 700 flight from Boigu Island to Thursday Island and Thursday Island to Horn Island Airport

†† Wages of Queensland Ambulance Service paramedic to travel from Thursday Island to Boigu Island return on the Rescue 700 flight

¶¶ Includes road transfers from Cairns Airport to Cairns Hospital and road transfers and commercial flights from Cairns to Boigu Island to repatriate

Costs rounded to the nearest Australian dollar



156 The median length of stay in the Australian healthcare system for 19 PNG patients diagnosed with TB  
157 and medically evacuated between 2016 and 2019 was 57 days (26-107). The length of stay for the  
158 patient in the case study was 24 days. Patients who received care in both Thursday Island and Cairns  
159 Hospitals experienced a median length of stay of 102 days, compared to a median stay of 43 days  
160 when receiving care in both Thursday Island and Townsville Hospitals.

161

## 162 **Discussion**

163 The economic burden of managing and treating TB patients is clear across different populations, and  
164 comparison of previously reported costs, with the cost of managing PNG nationals at the Australian  
165 border is complex. The cost to medically evacuate and manage a patient with pulmonary TB in this  
166 study was AUD 124,280. This is more than ten-fold higher than the average cost of providing full  
167 treatment to fully susceptible TB patients in Victoria, Australia, at AUD 11,583 [17]. Similarly, meta-  
168 analyses of TB treatment costs in the European Union estimated the average total cost to treat a fully  
169 susceptible TB patient was EU 10,282 (AUD 17,213.47) [18]. It is important to point out that this  
170 patient had drug-susceptible TB, which is associated with greatly reduced in-patient care expense  
171 compared to patients with highly drug-resistant TB. Most published cost analyses report the total cost  
172 of administering a full course of anti-TB treatment, whereas the primary goal for managing a critically  
173 unwell PNG national TB patient entering Australia via the TSPZ is to stabilise, diagnose, commence on  
174 treatment and refer back to the PNG health system for continuation of their treatment and care.

175

176 In total, TB-related presentations make up a small proportion of all patients who receive and are  
177 retrieved for care in the Torres Strait. In a typical year, there are just under 100 aeromedical  
178 evacuations from Torres Strait outer islands involving PNG nationals, of which around ten are TB-  
179 related. The designated funds provided by the Australian Government Department of Health to  
180 compensate Queensland Health for healthcare provision to PNG nationals seeking healthcare via the  
181 TSPZ under Schedule B is AUD 4.7million per year. If each aeromedical evacuation costs a similar

182 amount to our case study, there is a total shortfall in funding of over AUD 7.5 million per year to  
183 medically evacuate and manage PNG nationals. However, the true costs are unknown as analyses such  
184 as in this study are not routinely performed. In addition to better compensation for Queensland  
185 Health, greater transparency of expenditure and contractual milestone attainment could be achieved  
186 if the funds were held separately instead of being absorbed into HHSs.

187

188 As a result of the COVID-19 pandemic-related border closure between Australia and PNG in March  
189 2020, residents of the Treaty villages living adjacent to the Australian border have experienced a  
190 reduction in access to TB diagnostics, treatment and critical care, and it is likely that household  
191 transmission of TB has increased during this time. As Australia prepares to open up to the world once  
192 more, it will be imperative that Queensland Health are prepared for a potential influx of patients with  
193 critical care needs from PNG.

194

## 195 **Conclusion**

196 Funding of emergency evacuations for TB and other illnesses in this remote region, is necessary,  
197 unavoidable and expensive, and current levels of funding do not meet the demand. The high cost of  
198 patient care in such a remote setting, points to the benefit of supporting patients with critical care  
199 needs to prevent onward transmission of TB, as well as adequate budget allocation for aeromedical  
200 evacuation when required.

201

202

203

204

205

206 **Appendix A.** Extended methodology: the cost to medically evacuate and manage one Papua New  
207 Guinea national diagnosed with pulmonary tuberculosis within the Australian health system.  
208

209 The cost of this patient's outpatient and inpatient clinic visits was obtained from  
210 Queensland Health's fees and charges register [19]. Hospital and Health System cost  
211 categories included outpatient services confirmed as a Category 2 Emergency,  
212 pharmaceuticals, inpatient hospital stay, Royal Flying Doctors Service inter-facility  
213 transfer flight and other travel. The cost of inpatient hospital admission for Medicare  
ineligible patients includes clinician wages, meals, cleaning, pathology / procedures and  
diagnostic imaging.

214 Outpatient service expenses provided at Boigu Island Primary Health Centre include  
215 wages, cleaning, diagnostic imaging/procedures and pathology. Pharmaceuticals were  
216 calculated separately. Wages for the Torres and Cape TB Control Unit staff involved in  
providing an outpatient service to manage this patient were also calculated and reported  
separately.

217 Most travel-related costs (excluding aeromedical retrieval within the Torres Strait  
218 Islands) are borne by the Hospital and Health System in the jurisdiction where the  
219 patient first presented, regardless if additional travel across Queensland was required.  
All costs were reported separately for each health facility and the total cost of each  
category was provided.

220 The costs of pharmaceuticals were calculated by determining the full cost for any one  
221 item (i.e. box of Isoniazid 300mgs tablets), and multiplying this cost by the number of  
222 boxes or fractions of boxes required (this was obtained by dividing the number of doses  
223 administered to the patient by the total number of doses per box). Pathology was  
224 calculated per pathology request form rather than per test ordered, as per State billing  
requirements [20]. Item numbers for imaging services provided were obtained from the  
Queensland Health Medicare Benefits Schedule (MBS) Radiology Billing Manual [21] and  
then cross matched for cost from the MBS online [22].

225 Travel costs (excluding Boigu Island to Thursday Island; Thursday Island to Horn Island  
226 and Horn Island to Cairns) were sourced from the Torres and Cape Hospital and Health  
227 System patient travel and finance/revenue teams. These travel costs pertain to  
228 commercial flights and patient transport to and from relevant airports and hospitals.  
Travel costs did not include any expenses incurred by the patient or the Western  
Provincial Health Authority in PNG.

229

230

231

232

233

234

235

236

## 237 References

- 238 1. Bainomugisa A, Pandey, S., Donnan, E., Simpson, G., Foster, J. Cross-Border Movement of  
239 Highly Drug-Resistant Mycobacterium tuberculosis from Papua New Guinea to Australia  
240 through Torres Strait Protected Zone, 2010–2015. *Emerging Infectious Diseases* **2019**, 25  
241 (3).
- 242 2. Moran M, Curth-Bibb, J. *Too Close to Ignore: Australia's Borderland with PNG and*  
243 *Indonesia*. Melbourne University Press: Melbourne, Australia, 2020.
- 244 3. Parliament of Australia. Health service provision in the Torres Strait. Canberra, Australia,  
245 2013.
- 246 4. Prime Minister of Australia. Border restrictions. Available online:  
247 <https://www.pm.gov.au/media/border-restrictions> (accessed 3 November 2021).
- 248 5. Department of Foreign Affairs and Trade. Guidelines for traditional visitors travelling under  
249 the Torres Strait Treaty. Canberra, Australia, 2013.
- 250 6. Aia P, Wangchuk L, Morishita F, Kisomb J, Yasi R, Kal M, et al. Epidemiology of tuberculosis  
251 in Papua New Guinea: analysis of case notification and treatment-outcome data, 2008-  
252 2016. *Western Pacific Surveillance and Response Journal* **2018**, 9 (2), 9-19.
- 253 7. Foster J, McBryde, E., Taune, M., Peniyamina, D. Cross-border tuberculosis: opportunities,  
254 challenges and change. *The International Journal of Tuberculosis and Lung Disease* **2018**, 22  
255 (9), 1107-1108.
- 256 8. Australian Government Department of Health. Schedule B - Managing Torres Strait / Papua  
257 New Guinea Cross Border Health Issues. Canberra, Australia, 2016; pp. 1-4.
- 258 9. Australian Department of Health. The Australian health system. Australian Department of  
259 Health: Canberra, Australia, 2020.
- 260 10. Sunshine Coast Hospital and Health Service. Ineligible patient information. Sunshine Coast  
261 Hospital and Health Service: Sunshine Coast, Australia, 2016.
- 262 11. Medicare Australia. When you visit Australia: Information for visitors to Australia on  
263 Reciprocal Health Care Agreement. Available online:  
264 [https://www.servicesaustralia.gov.au/individuals/services/medicare/reciprocal-health-care-](https://www.servicesaustralia.gov.au/individuals/services/medicare/reciprocal-health-care-agreements/when-you-visit-australia)  
265 [agreements/when-you-visit-australia](https://www.servicesaustralia.gov.au/individuals/services/medicare/reciprocal-health-care-agreements/when-you-visit-australia) (accessed 30 December 2020).
- 266 12. National Indigenous Australians Agency. Expenditure on Aboriginal and Torres Strait  
267 Islander health compared to need. Australian Institute of Health and Welfare: Canberra,  
268 Australia, 2020.
- 269 13. Australian Department of Health. The strategic plan for control of tuberculosis in Australia,  
270 2016-2020: Towards disease elimination. Australian Department of Health: Canberra,  
271 Australia, 2019.
- 272 14. McIver L, Liu A. Streamlining chronic disease management in the Torres Strait: a review of  
273 current practice and recommendations for improvement. Proceedings of the 13th National  
274 Rural Health Conference, Darwin, Australia, 26 May 2015 ; Darwin, Northern Territory,  
275 2015.
- 276 15. Queensland Health. Retrieval Services Queensland: what we do. Queensland Aeromedical  
277 Retrieval and Disaster Management Branch: Brisbane, Australia, 2018.
- 278 16. Queensland Health. Retrieval Services Queensland: general information. Queensland  
279 Aeromedical Retrieval and Disaster Management Branch: Brisbane, Australia, 2018.
- 280 17. Chan EC, Nolan A, Denholm JT. How much does tuberculosis cost? An Australian healthcare  
281 perspective analysis. *Communicable Disease Intelligence* **2017** 41 (3), 191-194.
- 282 18. Diel R, Vandeputte, J., de Vries, G., Stillo, J., Wanlin,, M., Nienhaus, A. Costs of tuberculosis  
283 disease in the European Union: a systematic analysis and cost calculation. *European*  
284 *Respiratory Journal* **2014**, 43, 554-565.
- 285 19. Queensland Health. Queensland Health fees and charges register. Corporate Services  
286 Division: Brisbane, Australia, 2019.
- 287 20. Australian Government Department of Health. Pathology questions and answers for health  
288 professionals. Australian Government Department of Health: Canberra, Australia, 2019.  
289 Available online:  
290 <https://www1.health.gov.au/internet/main/publishing.nsf/Content/pathqa>
- 291 21. Queensland Health. Queensland Health MBS radiology billing manual for radiographer sites.  
292 Clinical and Statewide Service Radiology Support: Brisbane, Australia, 2012.

293 22. Australian Government Department of Health. Medicare Benefits Schedule: MBS  
294 Online.Available online:  
295 <http://www.mbsonline.gov.au/internet/mbsonline/publishing.nsf/Content/Home> (accessed  
296 4 April 2021).  
297

298 **Acknowledgments:** This work was supported by the Torres and Cape Hospital and Health Service Revenue  
299 Manager located on Thursday Island. The authors are grateful to the Queensland Aeromedical Retrieval and  
300 Disaster Management Branch and the Queensland Ambulance Service for access to data and revision of relevant  
301 sections within the manuscript.

302  
303  
304  
305  
306  
307  
308  
309  
310  
311  
312  
313  
314  
315  
316  
317  
318  
319  
320  
321  
322  
323  
324  
325  
326  
327  
328  
329  
330  
331  
332  
333  
334  
335  
336  
337  
338  
339  
340  
341  
342  
343  
344
